# Supplementary material
Source: PubMed Central journal article supplement (PMC1892961)
Supplement: pnas_0605569104_2.pdf [file pnas_0605569104_2.pdf]

TABLE 1. Foci of activations during anticipation of rewards with maximal uncertainty (anticipation period P=0.5 \$20 > P= 0.25 \$20) in the comparisons between the follicular and luteal phases of the menstrual cycle. All areas were significant at P<0.005, uncorrected for multiple comparisons (random effects model).

| Anatomical structure               | follicular>luteal    |     |     | luteal>follicular    |    |    |    |         |
|------------------------------------|----------------------|-----|-----|----------------------|----|----|----|---------|
|                                    | Peak MNI coordinates |     |     | Peak MNI coordinates |    |    |    |         |
|                                    | x                    | y   | z   | Z-value              | x  | y  | z  | Z-value |
| Right amygdalo/hippocampal complex | 27                   | -8  | -23 | 3.21                 |    |    |    |         |
| Right orbitofrontal cx             | 19                   | 42  | -4  | 3.35                 |    |    |    |         |
| Right inferior temporal gyrus      | 46                   | -46 | -8  | 3.43                 |    |    |    |         |
| Left middle temporal gyrus         | -65                  | -30 | 0   | 2.84                 |    |    |    |         |
| Left inf. temporal gyrus           | -53                  | -72 | 15  | 2.96                 |    |    |    |         |
| Right DLPFC                        |                      |     |     |                      | 38 | 30 | 30 | 3.04    |
|                                    |                      |     |     |                      | 34 | 15 | 53 | 2.79    |
| Anterior cingulate cx              |                      |     |     |                      | 0  | 23 | 46 | 2.69    |
