# Supplementary material
Source: PubMed Central journal article supplement (PMC1892961)
Supplement: pnas_0605569104_3.pdf [file pnas_0605569104_3.pdf]

TABLE 2. Foci of activations at the time of reward delivery versus no reward delivery in the comparisons between the follicular and luteal phases of the menstrual cycle. All areas were significant at  $P < 0.005$ , uncorrected for multiple comparisons (random effects model).

| Anatomical structure         | follicular>luteal    |     |     | luteal>follicular |                      |     |     |         |
|------------------------------|----------------------|-----|-----|-------------------|----------------------|-----|-----|---------|
|                              | Peak MNI coordinates |     |     | Z-value           | Peak MNI coordinates |     |     | Z-value |
|                              | x                    | y   | z   |                   | x                    | y   | z   |         |
| Midbrain region              | -4                   | -11 | -19 | 3.39              |                      |     |     |         |
| Left inf. frontal gyrus      | -57                  | 23  | 15  | 2.87              |                      |     |     |         |
| Left fronto-polar cortex     | -46                  | 49  | 0   | 3.11              |                      |     |     |         |
| Left amygdala                | -19                  | -8  | -15 | 3.32              |                      |     |     |         |
| Left head of caudate nucleus | -15                  | 23  | 11  | 2.99              |                      |     |     |         |
| Left Intra-parietal cx       |                      |     |     |                   | -23                  | -38 | 34  | 3.31    |
| Left m. Temporal gyrus       |                      |     |     |                   | -49                  | 0   | -19 | 2.9     |
