# Supplementary material
Source: PubMed Central journal article supplement (PMC1892961)
Supplement: pnas_0605569104_5.pdf [file pnas_0605569104_5.pdf]

TABLE 4. Foci of activations correlating with estradiol levels in the follicular phase during anticipation of rewards with maximal uncertainty and at the time of reward delivery. All areas were significant at  $P < 0.005$ , uncorrected for multiple comparisons (random effects model).

| Anatomical structure      | Positive correlation with estradiol during anticipation of rewards with maximal uncertainty |     |     |         | Negative correlation with estradiol during anticipation of rewards with maximal uncertainty |     |    |         | Positive correlation with estradiol at the time of reward delivery versus no reward delivery |    |    |         | Negative correlation with estradiol at the time of reward delivery versus no reward delivery |     |    |         |
|---------------------------|---------------------------------------------------------------------------------------------|-----|-----|---------|---------------------------------------------------------------------------------------------|-----|----|---------|----------------------------------------------------------------------------------------------|----|----|---------|----------------------------------------------------------------------------------------------|-----|----|---------|
|                           | Peak MNI coordinates                                                                        |     |     | Z-value | Peak MNI coordinates                                                                        |     |    | Z-value | Peak MNI coordinates                                                                         |    |    | Z-value | Peak MNI coordinates                                                                         |     |    | Z-value |
|                           | x                                                                                           | y   | z   |         | x                                                                                           | y   | z  |         | x                                                                                            | y  | z  |         | x                                                                                            | y   | z  |         |
| Right hippocampus         | 30                                                                                          | -23 | -15 | 3.1     |                                                                                             |     |    |         |                                                                                              |    |    |         |                                                                                              |     |    |         |
| Left hippocampus          | -30                                                                                         | -11 | -23 | 2.65    |                                                                                             |     |    |         |                                                                                              |    |    |         |                                                                                              |     |    |         |
| Middle Temporal gyrus     | 46                                                                                          | -4  | -11 | 3.92    |                                                                                             |     |    |         |                                                                                              |    |    |         |                                                                                              |     |    |         |
| Right Inf. temporal gyrus | 49                                                                                          | -53 | -8  | 3.22    |                                                                                             |     |    |         |                                                                                              |    |    |         |                                                                                              |     |    |         |
| Left Post-central gyrus   | -42                                                                                         | -4  | 15  | 3.04    |                                                                                             |     |    |         |                                                                                              |    |    |         |                                                                                              |     |    |         |
| Right Post-central gyrus  | 42                                                                                          | -4  | 11  | 3.1     |                                                                                             |     |    |         |                                                                                              |    |    |         |                                                                                              |     |    |         |
| Right sup. Parietal cx    | 27                                                                                          | -57 | 65  | 3.64    |                                                                                             |     |    |         |                                                                                              |    |    |         |                                                                                              |     |    |         |
| Hypothalamus              |                                                                                             |     |     |         | 4                                                                                           | -4  | -4 | 3.24    |                                                                                              |    |    |         |                                                                                              |     |    |         |
| Left fronto-polar cortex  |                                                                                             |     |     |         | -38                                                                                         | 61  | 15 | 3.68    | -38                                                                                          | 42 | 11 | 2.9     |                                                                                              |     |    |         |
| Right fronto-polar cortex |                                                                                             |     |     |         | 30                                                                                          | 65  | 11 | 3.3     | 34                                                                                           | 49 | 11 | 3.42    |                                                                                              |     |    |         |
| Left dorsolateral PFC     |                                                                                             |     |     |         |                                                                                             |     |    |         | -46                                                                                          | 8  | 27 | 3.14    |                                                                                              |     |    |         |
| Right dorsolateral PFC    |                                                                                             |     |     |         | 42                                                                                          | 23  | 38 | 3.4     | 34                                                                                           | 15 | 27 | 3.08    |                                                                                              |     |    |         |
| Right sup. frontal gyrus  |                                                                                             |     |     |         | 4                                                                                           | 42  | 57 | 3.92    | 30                                                                                           | 19 | 53 | 3.66    |                                                                                              |     |    |         |
| Anterior cingulate cx     |                                                                                             |     |     |         | 4                                                                                           | 49  | 19 | 3.12    | 4                                                                                            | -4 | 49 | 2.88    |                                                                                              |     |    |         |
| Thalamus                  |                                                                                             |     |     |         | -15                                                                                         | -11 | 4  | 3.16    |                                                                                              |    |    |         |                                                                                              |     |    |         |
| Pre-cuneus                |                                                                                             |     |     |         | -11                                                                                         | -80 | 49 | 3.74    |                                                                                              |    |    |         |                                                                                              |     |    |         |
| Left motor cortex         |                                                                                             |     |     |         |                                                                                             |     |    |         |                                                                                              |    |    |         | -38                                                                                          | -27 | 65 | 2.99    |
| m. occipital gyrus        |                                                                                             |     |     |         |                                                                                             |     |    |         |                                                                                              |    |    |         | 23                                                                                           | -84 | 4  | 2.95    |
