# Supplementary material
Source: PubMed Central journal article supplement (PMC1892961)
Supplement: pnas_0605569104_6.pdf [file pnas_0605569104_6.pdf]

TABLE 5. Foci of activations correlating with progesterone and estradiol levels in the luteal phase during anticipation of rewards with maximal uncertainty and at the time of reward delivery. All areas were significant at P < 0.005, uncorrected for multiple comparisons (random effects model).

| Anatomical structure               | Positive correlation with progesterone during anticipation of rewards with maximal uncertainty |     |     |         | Negative correlation with progesterone during anticipation of rewards with maximal uncertainty |    |    |         | Positive correlation with progesterone at the time of reward delivery versus no reward delivery |     |      |         | Negative correlation with progesterone at the time of reward delivery versus no reward delivery |     |     |         | Positive correlation with estradiol at the time of reward delivery versus no reward delivery |      |     |         | Negative correlation with estradiol at the time of reward delivery versus no reward delivery |   |     |         |     |      |     |      |  |  |  |  |
|------------------------------------|------------------------------------------------------------------------------------------------|-----|-----|---------|------------------------------------------------------------------------------------------------|----|----|---------|-------------------------------------------------------------------------------------------------|-----|------|---------|-------------------------------------------------------------------------------------------------|-----|-----|---------|----------------------------------------------------------------------------------------------|------|-----|---------|----------------------------------------------------------------------------------------------|---|-----|---------|-----|------|-----|------|--|--|--|--|
|                                    | Peak MNI coordinates                                                                           |     |     | Z-value | Peak MNI coordinates                                                                           |    |    | Z-value | Peak MNI coordinates                                                                            |     |      | Z-value | Peak MNI coordinates                                                                            |     |     | Z-value | Peak MNI coordinates                                                                         |      |     | Z-value | Peak MNI coordinates                                                                         |   |     | Z-value |     |      |     |      |  |  |  |  |
|                                    | x                                                                                              | y   | z   |         | x                                                                                              | y  | z  |         | x                                                                                               | y   | z    |         | x                                                                                               | y   | z   |         | x                                                                                            | y    | z   |         | x                                                                                            | y | z   |         | x   | y    | z   |      |  |  |  |  |
| Right amygdalo-hippocampal complex | 27                                                                                             | -19 | -11 | 3.13    |                                                                                                |    |    |         |                                                                                                 |     |      |         |                                                                                                 | 23  | 0   | -23     | 2.99                                                                                         | 23   | 0   | -23     | 3.33                                                                                         |   |     |         |     |      |     |      |  |  |  |  |
| Left amygdalo-hippocampal complex  | -34                                                                                            | -30 | -8  | 2.84    |                                                                                                |    |    |         |                                                                                                 |     |      |         |                                                                                                 |     |     |         |                                                                                              |      |     |         |                                                                                              |   | -23 | 4       | -15 | 2.65 |     |      |  |  |  |  |
| Right putamen                      | 30                                                                                             | 8   | -11 | 4.3     |                                                                                                |    |    |         |                                                                                                 |     |      |         |                                                                                                 |     |     |         |                                                                                              |      |     |         |                                                                                              |   |     |         |     |      |     |      |  |  |  |  |
| Left putamen                       | -27                                                                                            | 8   | 0   | 3.2     |                                                                                                |    |    |         |                                                                                                 |     |      |         |                                                                                                 |     |     |         |                                                                                              |      |     |         |                                                                                              |   |     |         |     |      |     |      |  |  |  |  |
| Left insula                        | -46                                                                                            | -8  | 4   | 3.08    |                                                                                                |    |    |         |                                                                                                 |     |      |         |                                                                                                 |     |     |         |                                                                                              |      |     |         |                                                                                              |   |     |         |     |      |     |      |  |  |  |  |
| Right fronto-polar cx              | 27                                                                                             | 65  | 0   | 3.43    |                                                                                                |    |    | 23      | 57                                                                                              | -4  | 3.54 |         |                                                                                                 |     |     |         |                                                                                              |      |     |         |                                                                                              |   |     |         |     |      |     |      |  |  |  |  |
| Left frontopolar cx                |                                                                                                |     |     |         |                                                                                                |    |    | -30     | 65                                                                                              | -8  | 3.54 |         |                                                                                                 |     | -8  | 65      | -4                                                                                           | 3.23 |     |         |                                                                                              |   |     |         | -11 | 72   | 8   | 3.33 |  |  |  |  |
| Right sup. frontal cx              |                                                                                                |     |     |         | 27                                                                                             | 34 | 53 | 3.13    |                                                                                                 |     |      |         |                                                                                                 |     |     |         |                                                                                              |      |     |         |                                                                                              |   |     | 19      | 46  | 34   | 3.5 |      |  |  |  |  |
| Right ventrolateral PFC            |                                                                                                |     |     |         |                                                                                                |    |    |         | 38                                                                                              | 34  | 11   | 3.77    |                                                                                                 |     |     |         |                                                                                              |      |     |         |                                                                                              |   |     |         |     |      |     |      |  |  |  |  |
| Left intra-parietal cx             |                                                                                                |     |     |         |                                                                                                |    |    |         | -27                                                                                             | -65 | 38   | 3.21    |                                                                                                 |     |     |         |                                                                                              |      |     |         |                                                                                              |   |     |         |     |      |     |      |  |  |  |  |
| R. posterior orbitofrontal cx      |                                                                                                |     |     |         |                                                                                                |    |    |         |                                                                                                 |     |      |         | 19                                                                                              | 11  | -15 | 3.14    | 15                                                                                           | 11   | -15 | 2.61    |                                                                                              |   |     |         |     |      |     |      |  |  |  |  |
| L. posterior orbitofrontal cx      |                                                                                                |     |     |         |                                                                                                |    |    |         |                                                                                                 |     |      |         | -27                                                                                             | 8   | -19 | 2.81    |                                                                                              |      |     |         |                                                                                              |   |     |         |     |      |     |      |  |  |  |  |
| Left lateral prefrontal cx         |                                                                                                |     |     |         |                                                                                                |    |    |         |                                                                                                 |     |      |         | -53                                                                                             | 15  | 23  | 3.39    |                                                                                              |      |     |         |                                                                                              |   |     |         |     |      |     |      |  |  |  |  |
| Left post central gyrus            |                                                                                                |     |     |         |                                                                                                |    |    |         |                                                                                                 |     |      |         | -38                                                                                             | -34 | 49  | 3.46    |                                                                                              |      |     |         |                                                                                              |   |     |         |     |      |     |      |  |  |  |  |
| Right post central gyrus           |                                                                                                |     |     |         |                                                                                                |    |    |         |                                                                                                 |     |      |         | 38                                                                                              | -30 | 53  | 3.35    |                                                                                              |      |     |         |                                                                                              |   |     |         |     |      |     |      |  |  |  |  |
| Anterior cingulate cortex          |                                                                                                |     |     |         |                                                                                                |    |    |         | 11                                                                                              | 49  | 15   | 3.05    |                                                                                                 |     |     |         |                                                                                              |      |     |         |                                                                                              |   |     |         | 8   | 46   | 11  | 3.12 |  |  |  |  |
| Middle temporal gyrus              | -53                                                                                            | -46 | -8  | 3.09    |                                                                                                |    |    |         |                                                                                                 |     |      |         |                                                                                                 |     |     |         |                                                                                              |      |     |         |                                                                                              |   | 46  | -72     | 15  | 3.15 |     |      |  |  |  |  |
| Left fusiform gyrus                |                                                                                                |     |     |         |                                                                                                |    |    |         | -23                                                                                             | -42 | -15  | 3.28    |                                                                                                 |     |     |         |                                                                                              |      |     |         |                                                                                              |   | -30 | -87     | 8   | 3.29 |     |      |  |  |  |  |
| Left occipital gyrus               |                                                                                                |     |     |         |                                                                                                |    |    |         | -15                                                                                             | -68 | 11   | 3.38    |                                                                                                 |     |     |         |                                                                                              |      |     |         |                                                                                              |   |     |         |     |      |     |      |  |  |  |  |
