# Supplementary material
Source: PubMed Central journal article supplement (PMC1892961)

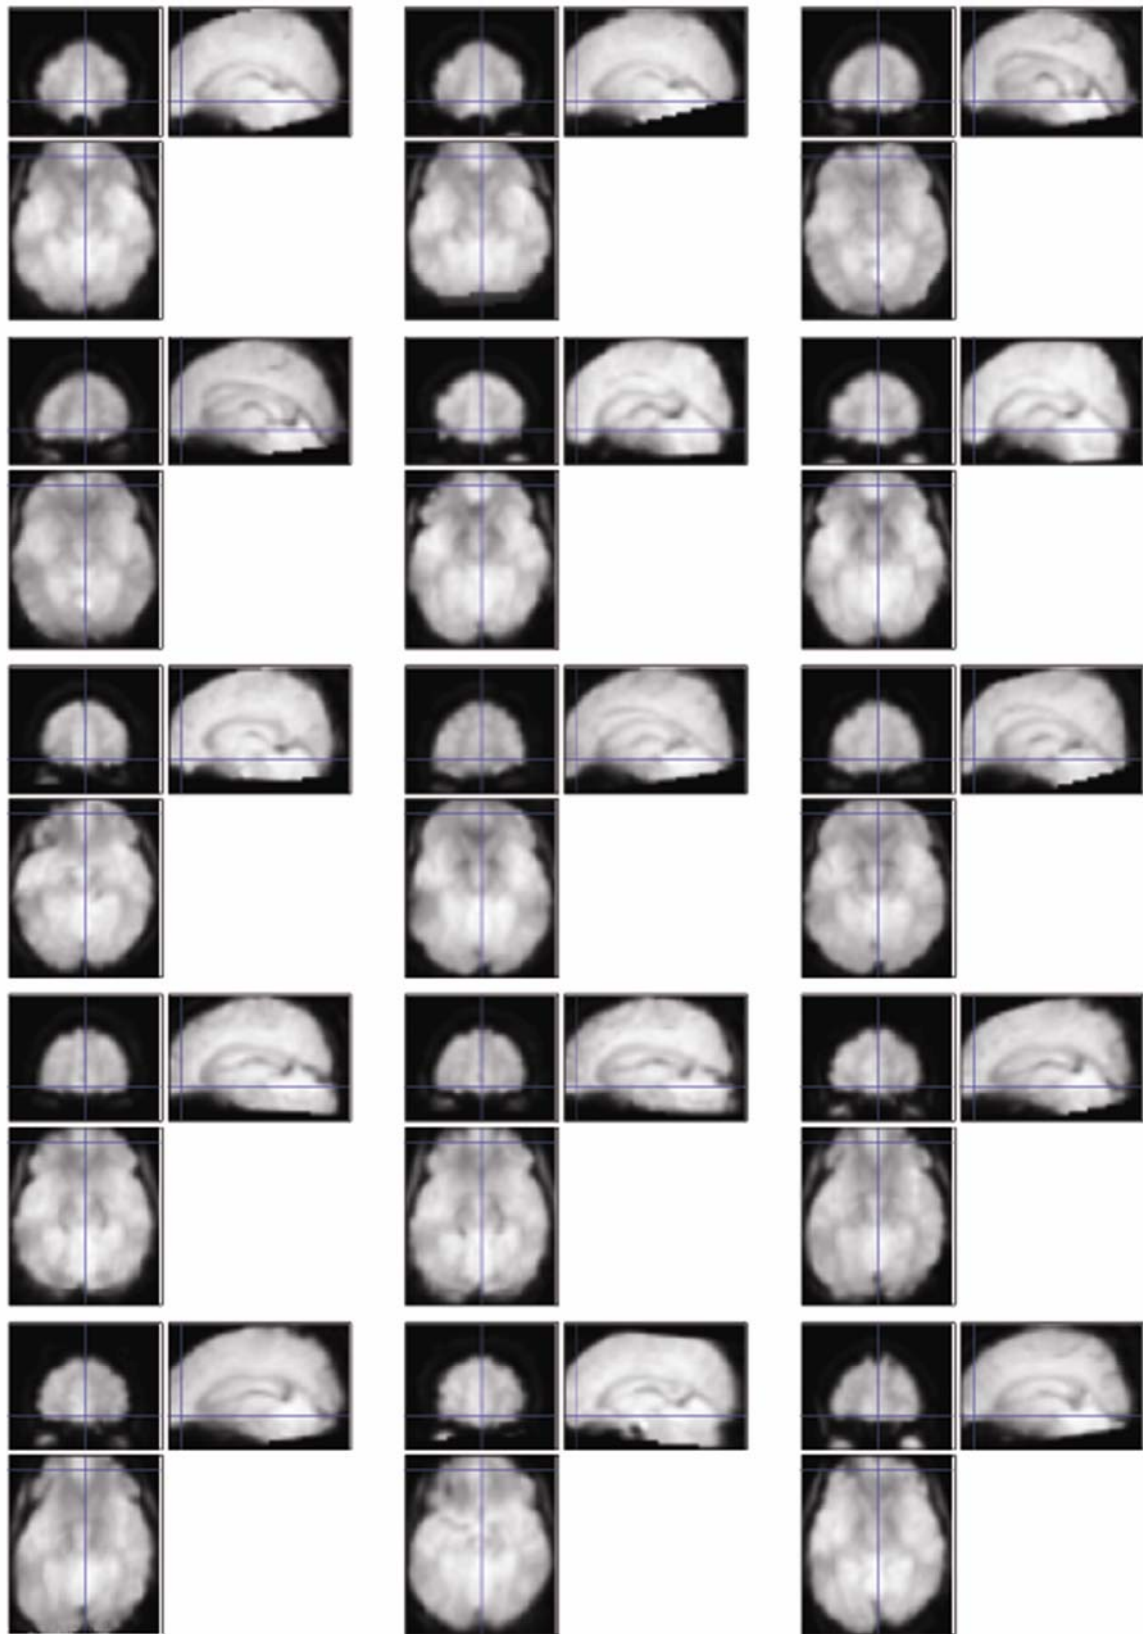

Supplement: pnas_0605569104_1.pdf [file pnas_0605569104_1.pdf]
